# Supplementary material for: Shp2 SUMOylation promotes ERK activation and hepatocellular carcinoma development
Source: PubMed Central journal article supplement (PMC4496222; doi:10.18632/oncotarget.3323), 2015-03-18
Supplement: oncotarget-06-9355-s001.pdf [file oncotarget-06-9355-s001.pdf]

SUPPLEMENTARY FIGURES AND TABLE

**A** Predicted SUMOylation sites of human Shp2 using the SUMOplot program

| No. | Position    | Peptide                   | Score |
|-----|-------------|---------------------------|-------|
| 1   | <b>K178</b> | IRCQE <b>LK</b> YD VGGGE  | 0.91  |
| 2   | <b>K99</b>  | GDVIE <b>LK</b> YP LNCAD  | 0.80  |
| 3   | <b>K213</b> | GTVLQ <b>LK</b> QP LNTR   | 0.80  |
| 4   | K244        | ETTDK <b>VK</b> QG FWEEF  | 0.76  |
| 5   | <b>K445</b> | LEEVEH <b>HK</b> QE SIMDA | 0.52  |
| 6   | K157        | VRTGD <b>DK</b> GE SNDGK  | 0.50  |
| 7   | K131        | LLTEK <b>GK</b> HG SFLVR  | 0.50  |
| 8   | K199        | LVEHY <b>KK</b> NP MVETL  | 0.37  |
| 9   | K91         | HGQLK <b>EK</b> NG DVIEL  | 0.33  |
| 10  | K266        | KLLYS <b>RK</b> EG QRQEN  | 0.27  |
| 11  | <b>K590</b> | GLMQQ <b>QK</b> SF R      | 0.15  |

<http://www.abgent.com/tools>

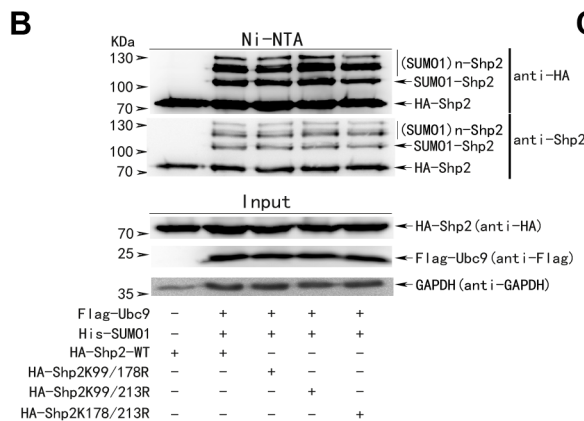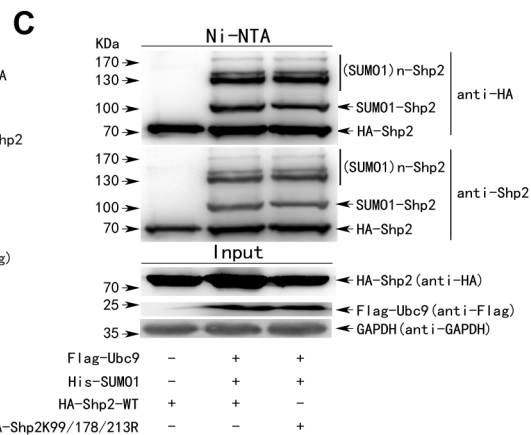

**Supplementary Figure S1: Human Shp2 SUMO-sites predicted by SUMOplot software and identified by mutation SUMOylation assays.** (A) SUMOylation sites of human Shp2 protein were predicted by the program of Abgent SUMOplot™ (<http://www.abgent.com/tool/sumoplot>). (B–C) Three highest-score sites K178, K99 and K213 were doubly (B) or triply (C) mutated, and performed with in vivo SUMOylation assay using Ni<sup>2+</sup>-NTA agarose beads. None of those mutants completely abolished Shp2 SUMOylation, suggesting that they are not SUMO-sites of Shp2 (These are related to Figure 2).

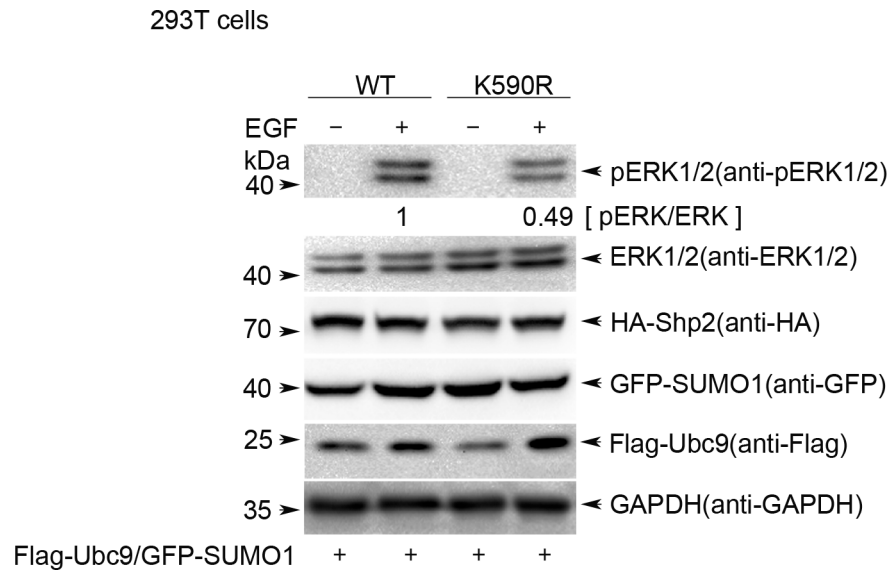

**Supplementary Figure S2: Shp2-K590R mutant downregulated ERK activities compared to Shp2-WT in 293T cells.** 293T cells were transfected with HA-Shp2WT or HA-Shp2K590R along with GFP-SUMO1 and Flag-Ubc9 plasmids. 24 h after transfection, Serum starved overnight and then stimulated with EGF for 5 minutes, ERK1/2 phosphorylations were detected by immunoblotting (This is related to Figure 3A).

A

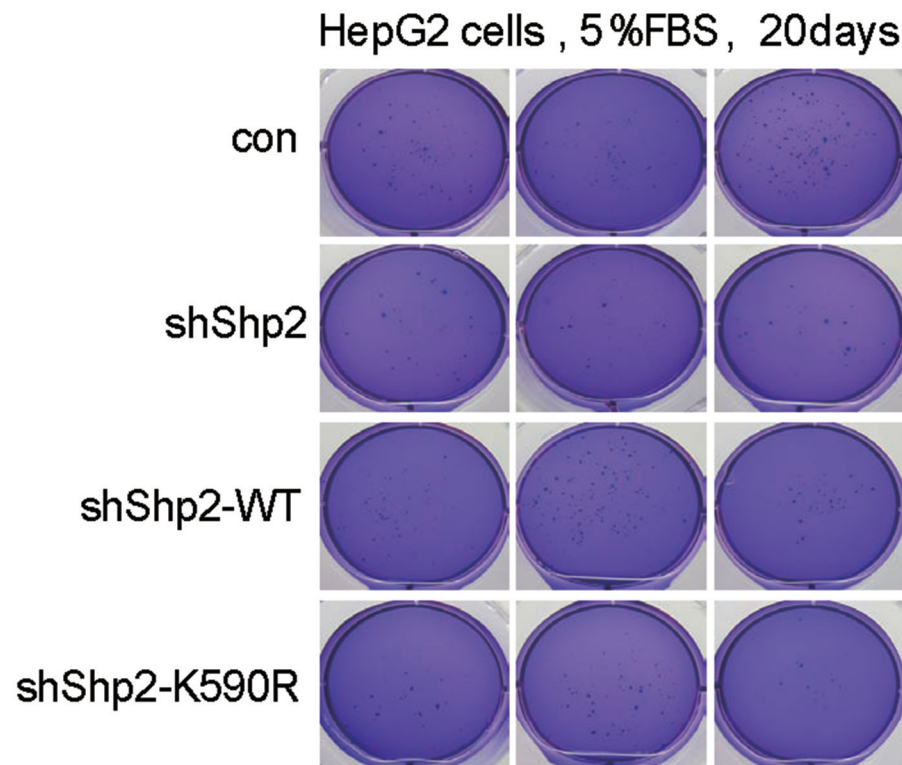

B

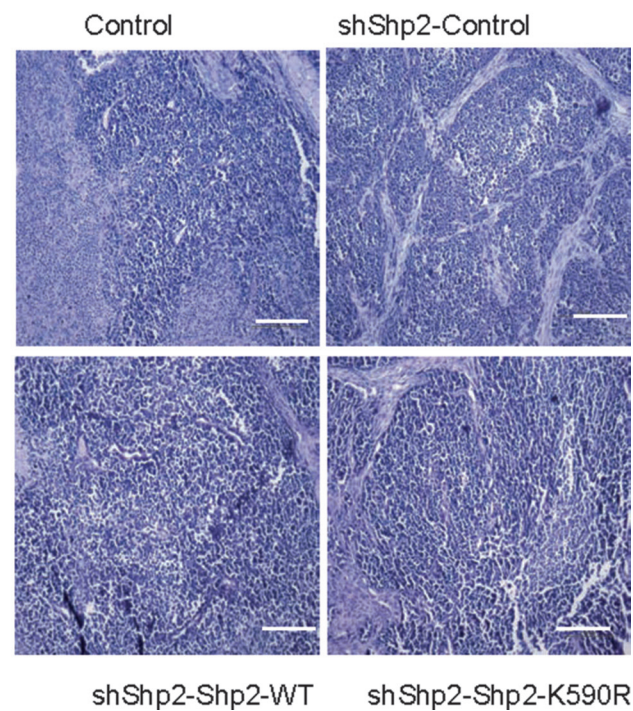

**Supplementary Figure S3: (A)** Soft agar colony-forming assays, stable HepG2-shShp2 and re-expressing Shp2-WT or Shp2-K590R cell lines were seeded in 2 ml of medium containing 5% FBS with 0.35% agar at 5000 cells/well and layered onto the base. The photographs were taken 20 days later, and images were representative of three independent experiments (This is related to Figure 3D). **(B)** Haematoxylin and eosin staining of tumor sections from the mouse xenografts (This is related to Figure 3E).

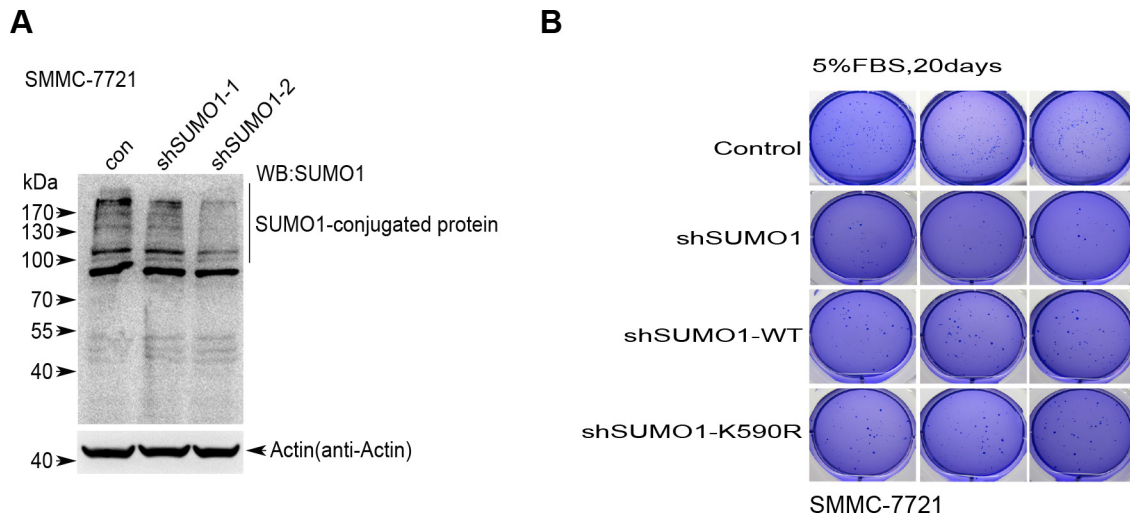

**Supplementary Figure S4: SUMO1 knockdown in SMMC-7721.** (A) The efficiency of SUMO1 knockdown with a short hairpin RNA in the lentiviral system in SMMC-7721 cells was assessed by immunoblotting (This is related to Figure 4C). (B) Soft agar colony forming assays, SMMC-7721-shSUMO1 stably expressing Shp2-WT or -K590R cells were seeded in 2 ml of medium containing 5% FBS with 0.35% agar at 2000 cells/well, respectively. The photographs were taken 20 days later, and the number of colonies was scored (This is related to Figure 4E) and images were representative of three independent experiments.

### K590 is evolutionarily conserved in different species

|              |                        |                           |                         |                 |                        |
|--------------|------------------------|---------------------------|-------------------------|-----------------|------------------------|
| human        | MQQQK <del>R</del> SFR | Ferrt                     | MQQQK <del>R</del> SFR  | pig             | MQQQK <del>R</del> SFR |
| mouse        | MQQQ <del>R</del> SFR  | fugu                      | MQQQKS                  | Pika            | MQQQK <del>R</del> SFR |
| rat          | MQQQ <del>R</del> SFR  | Gibbon                    | MQQQK <del>R</del> SFR  | Platypus        | MQQQK <del>R</del> SFR |
| alpaca       | MQQQK <del>R</del> SFR | guinea pig                | MQQQK <del>R</del> SFR  | Rabbit          | MQQQK <del>R</del> SFR |
| anole lizard | MQQQK <del>R</del> SFR | Hedgehog                  | MQQQK <del>R</del> SFR  | Squirrel        | MQQQK <del>R</del> SFR |
| Armadillo    | MQQQK <del>R</del> SFR | Horse                     | MQQQK <del>R</del> SFR  | Stickleback     | MQQQK <del>R</del> SFR |
| Bushbaby     | MQQQK <del>R</del> SFR | hyrax                     | MPQQK <del>R</del> SFR  | Tarsier         | MQQQK <del>R</del> SFR |
| cat          | MQQQK <del>R</del> SFR | kangaroo rat              | MQQQK <del>R</del> SFR  | Tasmanian devil | VQQQK <del>R</del> SLR |
| chicken      | MQQQK <del>R</del> SFR | Lesser hedgehog<br>tenrec | MQQQK <del>R</del> SFR  | tilapia         | MQQQK <del>R</del> SFR |
| Chimpanzee   | MQQQK <del>R</del> SFR | Macaque                   | MQQQK <del>R</del> SFR  | Tree shrew      | MQQQK <del>R</del> SFR |
| cod          | MQQQK <del>R</del> SFR | Marmoset                  | MQQQK <del>R</del> SFR  | Wallaby         | VQQQK <del>R</del> SFR |
| Coelacanth   | MQQQK <del>R</del> SFR | megabat                   | MQQQK <del>R</del> SFR  | Xenopus         | MQQQK <del>R</del> SFR |
| cow          | MQQQK <del>R</del> SFR | Mouse lemur               | MQQQK <del>R</del> SFR  | Zebra finch     | MQQQK <del>R</del> SFR |
| dog          | MQQQK <del>R</del> SFR | Opossum                   | LVQQQK <del>R</del> SFR | Zabrafish       | MQQQK <del>R</del> SHR |
| Dolphin      | MQQQK <del>R</del> SFR | Orangutan                 | MQQQK <del>R</del> SFR  |                 |                        |
| Elephant     | MQQQK <del>R</del> SFR | panda                     | MQQQK <del>R</del> SFR  |                 |                        |

**Supplementary Figure S5: Amino acid sequence alignment of the C-terminus sequences of Shp2 from different species.** The conserved lysines in the C-terminus region were highlighted (yellow). K590 is evolutionarily conserved in 44 different species but not in mouse and rat where it is arginine instead of lysine.

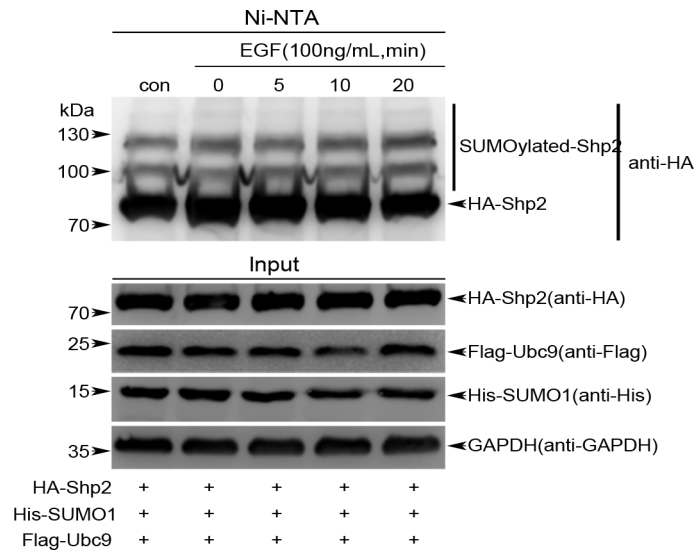

**Supplementary Figure S6: Shp2 SUMOylation can not be regulated by EGF in 293T cells.** 293T cells were transfected with HA-Shp2-WT, His-SUMO1 and Flag-Ubc9 plasmids. 36 h after transfection cells were serum-starved overnight, and then stimulated with EGF (100 ng/mL) for indicated time. The levels of Shp2 SUMOylation were detected by the SUMOylation assay with Ni-NTA resin.

**Supplementary Table S1: Primers used in this study**

|                              |                                                                 |
|------------------------------|-----------------------------------------------------------------|
| Shp2-N-SH2domain-Fprimer     | ccggaattcacatcgcggagatggttcacca                                 |
| Shp2-N-SH2domain-Rprimer     | ataagaatcgggccgcttaactctgcacagttcagaggat                        |
| Shp2-C-SH2domain-Fprimer     | ccggaattccctacctctgaaagggtggttcag                               |
| Shp2-C-SH2domain-Rprimer     | ataagaatcgggccgcttaacgagtcgtgtaaggggctgc                        |
| CD513B-HAShp2-Fprimer        | ccggaattcatgtatccttacgacgttcagact                               |
| CD513B-HAShp2-Rprimer        | ataagaatcgggccgctcatctgaaactttctgctgttg                         |
| CD513B-HAShp2(K590R)-Rprimer | ataagaatcgggccgctcatctgaaacttctgctgttg                          |
| shShp2-1-F(3'UTR)            | gatccgcagtaaattgtgcgctgtacttctgtcagatacagcgacacaatttaactgcttttg |
| shShp2-1-R(3'UTR)            | aattcaaaagcagtaaattgtgcgctgtatctgacaggaagtacagcgacacaatttaactg  |
| Shp2-1769(590)F              | gaagttcagatga                                                   |
| Shp2-1769(590)R              | tctgctgtgcatc                                                   |
| Shp2-296F                    | gatatcctctgaactgtgcagatcc                                       |
| Shp2-296R                    | taagctcaatgacatctccattctt                                       |
| Shp2-533F                    | gatacgacgttggtggaggagaac                                        |
| Shp2-533R                    | tcagttcctgacagcgaatcataac3'                                     |
| Shp2-638F                    | ggcagcccctaacacgactcgtat                                        |
| Shp2-638R                    | tgagttgtagtactgtaccaatgt                                        |
| hGab1-Fprimer                | ccggaattcgccaccatggattacaaggatgacgacgataagatgagcgggtggtgaagtgg  |
| hGab1-Rprimer                | ataagaatcgggccgctcatttcacactcttcgctgg                           |
| Gab1-SIM 1-Fprimer           | gccgcggtgctgatttaatttatgtcaacaagtag                             |
| Gab1-SIM 1-Rprimer           | aggcttctggcatgatcattttg                                         |
| Gab1-SIM 2-Fprimer           | gccgcggtgctccaccacactggaactcttggc                               |
| Gab1-SIM 2-Rprimer           | ctgatatggaggagtagagtagcag                                       |
| Shp2-587aa-Fprimer           | ccggaattcatgacatcgcggagatggtttcacc                              |
| Shp2-587aa-Rprimer           | ataagaatcgggccgctcattgcatcaggcccacgtttcatag                     |
| Shp2-CD513B-587aa-Fprimer    | tgagcggccgcaaggatctgcgatc                                       |
| Shp2-CD513B-587aa-Rprimer    | ttgcatcaggcccacgtttcatagac                                      |
| mShp2-Fprimer                | ccggaattcatgacatcgcggagatggtttcacc                              |
| mShp2-Rprimer                | ataagaatcgggccgctcatctgaaactcctctgctgctgc                       |
| mShp2-R590K-Fprimer          | agagttcagatgagcggccgc                                           |
| mShp2-R590K-Rprimer          | tctgctgctgatgagcccac                                            |
| SUMO1(2-96AA)-Fprimer        | cgcgatcctctgaccaggaggcaaaccttc                                  |
| SUMO1(2-96AA)-Rprimer        | ataagaatcgggccgctaccctgttctgataaac                              |
| K590R-Rprimer(TGA deletion)  | cgcgatcctctgaaacttctgctgttg                                     |
| 587AA-Rprimer(TGA deletion)  | cgcgatccttgcacagcccacgtttcatag                                  |
